# Supplementary material for: The Association of Virulence Factors with Genomic Islands
Source: PLoS One. 2009 Dec 1;4(12):e8094. doi: 10.1371/journal.pone.0008094 (PMC2779486; doi:10.1371/journal.pone.0008094)
Supplement: Table S1 — Complete list of VFDB functional classifications of pathogen-associated and “common” virulence factors from the VFDB. Only statistically significant categories are shown in Table 3. (0.07 MB DOC) [file pone.0008094.s003.doc]

## Table S1 - VFDB classification of Pathogen-associated and “Common” VFs

| **VFDB Classificationa** | **Pathogen-associated VFs (%)b** | **“Common” VFs (%)b** | ***p*-valuec** |
| --- | --- | --- | --- |
| Categories with a higher percentage of Pathogen-associated VFs |  |  |  |
| Toxin (O) | 79 (15.28) | 58 (3.27) | 1.84E-18* |
| Type III secretion systemd (O) | 117 (22.63) | 175 (9.87) | 1.02E-11* |
| Type IV secretion systeme (O) | 32 (6.19) | 51 (2.88) | 4.77E-03* |
| Plasminogen activator (O) | 2 (0.39) | 1 (0.06) | 4.06E-01 |
| Anti-proteolysis (D) | 1 (0.19) | 0 (0.00) | 4.97E-01 |
| Antivirulence (R) | 1 (0.19) | 0 (0.00) | 4.97E-01 |
| Actin-based motility (O) | 1 (0.19) | 1 (0.06) | 7.34E-01 |
| Proinflammatory effect (NS) | 1 (0.19) | 1 (0.06) | 7.34E-01 |
| Capsule (D) | 1 (0.19) | 3 (0.17) | 1.00E+00 |
| Unclassified (NA) | 151 (29.21) | 505 (28.48) | 1.00E+00 |
| Categories with a higher percentage of "Common" VFs |  |  |  |
| Motility (NS) | 0(0.00) | 75 (4.23) | 9.95E-08* |
| Antiphagocytosis (D) | 6 (1.16) | 105 (5.92) | 1.13E-05* |
| Iron uptake (NS) | 5 (0.97) | 92 (5.19) | 2.51E-05* |
| Endotoxin (NS) | 0 (0.00) | 32 (1.80) | 2.98E-03* |
| Type II secretion system (NS) | 0 (0.00) | 22 (1.24) | 4.24E-02* |
| Regulation (R) | 2 (0.39) | 32 (1.80) | 1.01E-01 |
| Intracellular survival (NS) | 0 (0.00) | 12 (0.68) | 2.93E-01 |
| Adherence (O) | 78 (15.09) | 319 (17.99) | 4.06E-01 |
| Cell wall (NS) | 0 (0.00) | 11 (0.62) | 4.06E-01 |
| Secretion system (other)f (NS) | 32 (6.19) | 141 (7.95) | 4.97E-01 |
| Cellular metabolism (D) | 0 (0.00) | 9 (0.51) | 4.97E-01 |
| Enzyme (O) | 0 (0.00) | 8 (0.45) | 4.97E-01 |
| Invasion (O) | 2 (0.39) | 18 (1.02) | 5.87E-01 |
| Exoenzyme (NS) | 5 (0.97) | 30 (1.69) | 6.19E-01 |
| Immune evasion (D) | 1 (0.19) | 10 (0.56) | 8.33E-01 |
| Biofilm formation (D) | 0 (0.00) | 4 (0.23) | 9.46E-01 |
| Molecular mimicry (NS) | 0 (0.00) | 4 (0.23) | 9.46E-01 |
| IgA1 Protease (D) | 0 (0.00) | 3 (0.17) | 1.00E+00 |
| Intracellular growth (NS) | 0 (0.00) | 3 (0.17) | 1.00E+00 |
| Magnesium uptake (NS) | 0 (0.00) | 3 (0.17) | 1.00E+00 |
| Serum resistance (D) | 0 (0.00) | 3 (0.17) | 1.00E+00 |
| Biosurfactant (NS) | 0 (0.00) | 2 (0.11) | 1.00E+00 |
| Complement protease (D) | 0 (0.00) | 2 (0.11) | 1.00E+00 |
| Pigment (O) | 0 (0.00) | 2 (0.11) | 1.00E+00 |
| Secreted proteins (O) | 0 (0.00) | 2 (0.11) | 1.00E+00 |
| Bile resistance (D) | 0 (0.00) | 1 (0.06) | 1.00E+00 |
| Complement resistance (D) | 0 (0.00) | 1 (0.06) | 1.00E+00 |
| Heat-shock protein (NS) | 0 (0.00) | 1 (0.06) | 1.00E+00 |
| Manganese uptake (NS) | 0 (0.00) | 1 (0.06) | 1.00E+00 |
| Nutrient acquisition (NS) | 0 (0.00) | 1 (0.06) | 1.00E+00 |
| Peptidase (D) | 0 (0.00) | 1 (0.06) | 1.00E+00 |
| Resistance to antimicrobial peptides (D) | 0 (0.00) | 1 (0.06) | 1.00E+00 |

aVFs are defined as those genes curated as being VFs according to the VFDB. VFs are also categorized, according to the VFDB, as O = Offensive; D = Defensive; NS= Nonspecific; R = Regulation; NA = Not Available

bBased on the percentage of pathogen-associated or “Common” VFs in a given functional category

cFisher’s Exact test followed by the Benjamini-Hochberg multiple testing correction. Asterisks indicate statistical significance (p-value < 0.05).

dIncludes Type III secretion system genes and Type III translocated proteins.

eIncludes Type IV secretion system genes and Type IV secretory proteins.

fIncludes Secretion system genes not classified as Type II, III or IV secretion system
